1 Bacteriocinogenic lactic acid bacteria in the traditional cereal-based beverage Boza: a  
2 genomic and functional approach

3

4 Luciano Lopes Queiroz<sup>1,§</sup>, Christian Hoffmann<sup>2,§,\*</sup>, Gustavo Augusto Lacorte<sup>2,3</sup>,  
5 Bernadette Dora Gombossy de Melo Franco<sup>2</sup>, Svetoslav Dimitrov Todorov<sup>4,#,\*</sup>

6

7 1. Microbiology Graduate Program, Department of Microbiology, Institute of  
8 Biomedical Science, University of São Paulo, São Paulo, SP, Brazil

9 2. Food Research Center (FoRC), Universidade de São Paulo, Faculdade de Ciências  
10 Farmacêuticas, São Paulo (SP), Brazil

11 3. Instituto Federal de Minas Gerais, Bambuí (MG), Brazil

12 4. Laboratório de Microbiologia de Alimentos, Departamento de Alimentos e Nutrição  
13 Experimental, Faculdade de Ciências Farmacêuticas, Universidade de São Paulo, São  
14 Paulo (SP), Brazil

15

16 <sup>§</sup> contributed equally to this work

17 # Current address: ProBacLab, Department of Advanced Convergence, Handong  
18 Global University, Pohang, Gyeongbuk 37554, Republic of Korea

19 \* Correspondent authors: [c.hoffmann@usp.br](mailto:c.hoffmann@usp.br); [slavi310570@abv.bg](mailto:slavi310570@abv.bg)

20

## 21 **Abstract**

22 Boza is a traditional low-alcohol fermented beverage from the Balkan Peninsula,  
23 frequently explored as a functional food product. The product is rich in Lactic Acid  
24 Bacteria (LAB) and some of them can produce bacteriocins. In this study, a sample of  
25 Boza from Belogratchik, Bulgaria, was analyzed for the presence of bacteriocinogenic

26 LAB, and after analyses by RAPD-PCR, three representative isolates were characterized  
27 by genomic analyses, using whole genome sequencing. Isolates identified as  
28 *Pediococcus pentosaceus* ST75BZ and *Pediococcus pentosaceus* ST87BZ contained  
29 operons encoding for bacteriocins pediocin PA-1 and penocin A, while isolate identified  
30 as *P. acidilactici* ST31BZ contained only the operon for pediocin PA-1 and a  
31 CRISPR/Cas system for protection against bacteriophage infection. The antimicrobial  
32 activity of bacteriocins produced by the three isolates was inhibited by treatment of the  
33 cell-free supernatants with proteolytic enzymes. The produced bacteriocins inhibited the  
34 growth of *Listeria monocytogenes*, *Enterococcus* spp. and some *Lactobacillus* spp.,  
35 among other tested species. The levels of bacteriocin production varied from 3200  
36 AU/ml to 12800 AU/ml recorded against *L. monocytogenes* 104, 637 and 711, measured  
37 at 24 h of incubation at 37°C. All bacteriocins remained active after incubation at pH  
38 2.0 to 10.0. The activity mode of the studied bacteriocins was bactericidal, as  
39 determined against *L. monocytogenes* 104, 637 and 711. In addition, bactericidal  
40 activity was demonstrated using a cell leakage  $\beta$ -galactosidase assay, indicating a pore  
41 formation mechanism as a mode of action. The present study highlights the importance  
42 of combining metagenomic analyses and traditional microbiological approaches as way  
43 of characterizing microbial interactions in fermented foods.

44

45 **Keywords:** Boza, lactic acid bacteria, bacteriocins, metagenomic analyses, whole  
46 genome sequencing

47

## 48 **Introduction**

49 Boza is a traditional fermented cereal product, popular in many countries in the Balkan  
50 Peninsula, spread throughout the Middle East region by the Ottoman Empire<sup>1,2</sup>. There

51 are several beneficial properties attributed to Boza: besides its high nutritional value,  
52 there is a diverse set of recommendations in traditional medicine<sup>1</sup>.

53 The microbiological composition of Boza includes several species of lactic acid  
54 bacteria (LAB), such as *Lactobacillus acidophilus*, *Lactobacillus brevis*, *Lactobacillus*  
55 *coprophilus*, *Lactobacillus coryniformis*, *Lactobacillus fermentum*, *Lactobacillus*  
56 *paracasei*, *Lactobacillus pentosus*, *Lactobacillus plantarum*, *Lactobacillus rhamnosus*,  
57 *Lactobacillus sanfrancisco*, *Lactococcus lactis* subsp. *lactis*, *Leuconostoc*  
58 *mesenteroides*, *Leuconostoc mesenteroides* subsp. *dextranicum*, *Leuconostoc*  
59 *raffinolactis*, *Leuconostoc lactis*, *Enterococcus faecium*, *Pediococcus pentosaceus*,  
60 *Oenococcus oeni*, *Weissella confusa* and *Weissella paramesenteroides*<sup>1,2</sup>. Several of  
61 these LAB species contain beneficial strains, used as probiotics as starter cultures, and  
62 for food biopreservation<sup>3</sup>.

63 The application of LAB in food biopreservation is related to their ability of  
64 producing metabolites with antimicrobial activity, explored by traditional fermentation  
65 processes and traditional medicine for centuries. Bacteriocins constitute a group of  
66 inhibitory metabolites produced by LAB, presenting a polypeptide nature and produced  
67 in the bacterial ribosomal complex with no post-translational modification. Usually, the  
68 producer bacteria are immune to their own bacteriocins, due to mechanisms present in  
69 their genome<sup>4</sup>.

70 Bacteriocins have been described as effective against closely related species<sup>4</sup>.  
71 However, some reports have found unorthodox bacteriocin activities, such as inhibition  
72 of some viruses, *Mycobacterium spp.* as well as some fungi<sup>5,6</sup>. Several LAB isolated  
73 from Boza have been characterized for their ability to produce bacteriocins and  
74 proposed for different applications in biopreservation processes<sup>1</sup>.

75 Bacteriocins are known for their low cytotoxicity, being considered generally safe  
76 for human and animal consumption<sup>7,8</sup>. In the last decade, special attention was given to  
77 their pharmaceutical properties and potential application in human and veterinary  
78 medicine<sup>4,5</sup>.

79 In this study, we used a whole genome sequencing approach for the  
80 characterization of bacteriocins produced by some selected strains of lactic acid  
81 bacteria, isolated from Boza. This approach is important for a better understanding of  
82 the potential of application of this technological strategy to improve the safety of  
83 fermented food products.

84

## 85 **Results**

### 86 **Screening for bacteriocinogenic LAB**

87 The average bacterial population in the Boza samples was  $1.1 \times 10^8$  CFU/ml recorded  
88 by plating on MRS. Colony morphology on MRS agar plates, Gram-staining and  
89 catalase test indicated that the majority of the isolates were lactic acid bacteria (LAB),  
90 with coccoid and rod morphology. Preliminary screening tests for microbial inhibition  
91 indicated that most colonies were active against *Listeria monocytogenes* 104. The  
92 majority presented coccid morphology and were Gram positive, catalase negative and  
93 oxidase positive. The cell-free supernatants (CFS) of 18 isolates presented antimicrobial  
94 activity against *L. monocytogenes* 104 and *E. faecium* ATCC 10434. The activity was  
95 lost after treatment of the CFS with Proteinase K and pronase, but not when treated with  
96  $\alpha$ -amylase, lipase or catalase, indicating the proteinaceous nature of the antimicrobial  
97 activity. Bio-molecular fingerprinting based on RAPD-PCR grouped these isolates in 3  
98 distinct groups. One isolate from each group was submitted to 16S rRNA sequencing  
99 for identification, resulting in *Pediococcus acidilactici* (one isolate) and *P. pentosaceus*

100 (two isolates). These isolates were submitted to whole genome sequencing for a better  
101 characterization of the bacteriocin production.

102

### 103 ***Pediococcus acidilactici* ST31BZ genome characterization**

104 The genome assembly for strain ST31BZ produced 19 contigs with N50 of 433,517 bp  
105 and 235x coverage. MiGA essential genes analysis showed a completeness of 94.6%,  
106 contamination of 1.8%, with an overall quality of 85.6%. We detected 105 of 111  
107 essential genes in this genome and it was classified by MiGA using genome-aggregate  
108 Average Nucleotide and Amino Acid Identity (ANI/AAI) concepts as *P. acidilactici*,  
109 and closely related with *P. acidilactici* ZPA017 (NZ\_CP015206.1) (98.89% ANI),  
110 isolated from black pig in Beijing, China.

111 The genome size for *P. acidilactici* ST31BZ isolate was 1,899,329 bp, with  
112 42.18% GC-content, and 1,847 predicted protein-coding genes and no pseudogenes  
113 (Fig. 1a). We detected 50 tRNA and three rRNAs operons with complete 16S, 23S, and  
114 5S coding regions. One CRISPR repeat with 36nt and 366 bp length was detected and a  
115 CAS-Type IIA System (*cas9*, *cas1*, *cas2*, and *csn2*) upstream of the CRISPR array. Two  
116 circular plasmids were found and designated as pST31BZ-1 with 49,093 bp and  
117 pST31BZ-2 with 9,090 bp containing a pediocin PA-1 operon (Fig. 2a). The pST31BZ-  
118 1 plasmid was similar to pHN9-1 (BLASTn, Identity: 98.19%; Coverage: 58%), a  
119 42,239 bp plasmid found in *P. acidilactici* HN9 isolated from the Traditional Thai-Style  
120 Fermented Beef Nhang (Surachat *et al.*, 2021). No antibiotic resistance genes were  
121 predicted using ARIBA in the genome or plasmids of strain ST31BZ, however, we were  
122 able to predict the following resistance genes using the KEGG GhostKoala automatic  
123 annotation pipeline: Lantibiotic transporter system (NisE/F/G), Lincosamide and  
124 streptogramin A resistance (Lsa), Beta lactamase class A (PenP), Cationic antimicrobial

125 peptide (CAMP) resistance, *dltABCD* operon (Dlt A/B/C/D), and two Multidrug efflux  
126 pump (*EfrA/B* and *AbcA*).

127 *P. acidilactici* ST31BZ genome presented genes coding for several sugar  
128 transporters such as sucrose, maltose/glucose and cellobiose, and is likely able to  
129 degrade them all to lactate and acetate. We also found evidence that the strain is able to  
130 synthesize arginine, glycine, alanine, serine, asparagine, aspartate, glutamine and  
131 glutamate (Supplementary Table 1).

132

### 133 ***Pediococcus pentosaceus* ST75BZ and ST87BZ genome characterization**

134 The assembled genomes of the two *P. pentosaceus* isolates presented a very high  
135 similarity (99.99% ANI), despite being analyzed separately, the only difference being  
136 that we obtained 15 contigs with N50 of 282,292 bp and 63x genome coverage for  
137 isolate ST75BZ, and 15 contigs with N50 of 296,046 bp and 62x genome coverage for  
138 isolate ST87BZ. The following results apply to both isolates and we will refer to them  
139 as strain *P. pentosaceus* ST75BZ and ST87BZ for the remainder of the text (Fig. 1b).

140 MiGA essential genes analysis showed a completeness of 95.5%, contamination  
141 of 1.8% and an excellent quality of 86.5% for both isolates. We detected 106 of 111  
142 essential genes and this strain was taxonomically classified by MiGA, using genome-  
143 aggregate ANI/AAI concepts, as *P. pentosaceus*, and closely related with *P.*  
144 *pentosaceus* ATCC 25745 (NC\_008525.1) (99.1% ANI). The genome size for *P.*  
145 *pentosaceus* ST75BZ and ST87BZ isolate was 1,810,333 bp, average GC content was  
146 37.08%, with 1,773 protein-coding genes predicted and no pseudogenes. We detected  
147 50 tRNA and three rRNAs operons with complete 16S, 23S, and 5S coding regions. No  
148 CRISPR repeats were detected. One circular plasmid was found and designated as  
149 pST75BZ and pST87BZ-1 with 9,342 bp containing a pediocin PA-1 operon (Fig. 2b).

150 Other pediocin-like bacteriocin operon found was annotated as penocin A (Fig. 2c),  
151 present in the strain's genome. We also found point mutations in the 23S rRNA coding  
152 sequence predicted to confer resistance to macrolides (azithromycin) and streptogramins  
153 using ARIBA. Using KEGG GhostKoala pipeline, other resistance genes were also  
154 detected: Beta lactamase class A gene (*PenP*), a Cationic Antimicrobial Peptide  
155 (CAMP) resistance gene, the *dltABCD* operon (*Dlt A/B/C/D*), two Multidrug efflux  
156 pump genes (*EfrA/B* and *AbcA*); and a lincosamide resistance gene (*Lsa*). The genome  
157 of *P. pentosaceus* ST75BZ and ST87BZ presented similar values for size, GC content,  
158 number of predicted proteins and ribosomal operons as 65 strains of *P. pentosaceus* in  
159 China<sup>9</sup>.

160       Strains *P. pentosaceus* ST75BZ and ST87BZ genome presented similar metabolic  
161 capabilities as *P. acidilacti* ST31BZ, however this strain has a reduced sugar transport  
162 capability, is able to synthesize lysine and is positive for genes encoding for a quorum  
163 sensing mechanism that we were not able to attribute to a distinct physiologic state or  
164 metabolic process (Supplementary Table 2).

165

#### 166 **Pangenomic analysis of *Pediococcus* spp.**

167 Pangenomic analysis of the *Pediococcus* spp. isolates was carried out using Anvi'o v6.1  
168 (Eren et al. 2015) with the pangenomic workflow. We selected five complete genomes  
169 of *P. acidilactici* and compared to *P. acidilactici* ST31BZ genome (Fig. 3a). *P.*  
170 *acidilactici* ST31BZ strain formed a related group with *P. acidilactici* ZPA017 (98.89%  
171 ANI) and BCC1 (98.84% ANI). We found 1487 core genes (1360 Single-copy Core  
172 genes, SCG) in all six genomes. *P. acidilactici* ST31BZ has 152 unique genes  
173 (Supplementary Table 3). COG annotation indicated prediction of six genes that encode  
174 phage-related proteins, in addition to six genes related to transposase activity, and 15

175 genes involved in carbohydrate metabolism, including a Na<sup>+</sup>/melibiose symporter and  
176 an arabinose efflux permease.

177 Four complete genomes of *P. pentosaceus* were compared to the *P. pentosaceus*  
178 ST75/ST87 strain (Fig. 3b). *P. pentosaceus* ST75BZ and ST87BZ presented a total of  
179 1446 core genes (1373 Single-copy Core genes, SCG) also observed in all compared  
180 genomes. However, *P. pentosaceus* ST75BZ and ST87BZ strains have 142 unique  
181 genes (Supplementary Table 4).

182 Based on the pangenomes of our isolates against reference genomes, we propose  
183 *P. pentosaceus* ST31BZ as a new strain of *P. acidilactici* and strains ST75BZ and  
184 ST87BZ as a new strain of *P. pentosaceus*. The two closest strains to *P. acidilactici*  
185 were ZPA017 and BCC-1, isolated from feces of a healthy pig<sup>10</sup> and cecum of a broiler  
186 chicken<sup>11</sup>, respectively. The unique genes present in our isolates were related to  
187 antibiotic resistance and prophages, such as glycopeptide antibiotics resistance protein  
188 (COG4767) and phage portal protein BeeE (COG4695) in *P. acidilactici* ST31BZ  
189 (Supplementary Table 3); and ABC-type multidrug transport system (COG0842) and  
190 phage terminase large subunit (COG1783) in *P. pentosaceus* ST75BZ and ST87BZ. *P.*  
191 *pentosaceus* ST75BZ and ST87BZ, also showed the presence genes related to SOS  
192 response system, such as SOS-response transcriptional repressor (COG1974)  
193 (Supplementary Table 4).

194 Our two novel isolates presented pediocin PA-1 coding genes in their plasmids,  
195 which were highly similar (96% identity). Additionally, *P. pentosaceus* ST75BZ and  
196 ST87BZ presented a penocin A gene in its genome. Our annotation pipeline also  
197 detected bacteriocin genes in some of the strains used in the pangenome analysis: we  
198 detected two enterolysin A genes in the genome of *P. acidilactici* BCC1, a bovicin  
199 coding gene in *P. acidilactici* BCC1 plasmid; an enterolysin A gene in the genome of *P.*



200 *acidilactici* ZPA017; and a penocin A gene and enterolysin A gene in the genome of *P.*  
201 *pentosaceus* ATCC 25745.

202

### 203 **Bacteriocin production kinetics and stability tests**

204 For *P. acidilactici* ST31BZ, *P. pentosaceus* ST75BZ and *P. pentosaceus* ST87BZ, only  
205 a small amount of bacteriocins were detected in the cell surfaces (approximately 200  
206 AU/ml), with the majority of activity detected in cell-free culture supernatants. All  
207 remaining assays were carried out using cell-free supernatants, unless otherwise stated.

208 We characterized the bacteriocins produced by our three selected isolates for their  
209 stability in different pH, salt concentration, temperature and detergents. The three  
210 isolates grew well when cultured in MRS at 25, 30 and 37°C for 24 h, and produced  
211 bacteriocins (12800 AU/ml for ST31BZ and 3200 AU/ml for ST75BZ and ST87BZ).  
212 All further experiments were performed at 37°C, taking in consideration potential future  
213 applications of these strains as probiotics for human application. The activity of the  
214 bacteriocins remained unaltered after exposure to different pH (from 4.0 to 10.0),  
215 temperature (10, 25, 30, 37, 45, 80, 100 °C for up to 240 min, and at 121 °C for 15 min),  
216 or in the presence of NaCl, skim milk, SDS, Tween 20 and Tween 80 and EDTA,  
217 highlighting their potential versatility for use in industrial settings (data not shown).

218 The end-pH recorded for *P. acidilactici* ST31BZ, *P. pentosaceus* ST75BZ and *P.*  
219 *pentosaceus* ST87BZ when cultured overnight in MRS at 37°C were 4.43, 4.1 and 4.05,  
220 respectively (Fig. 4a). Over the same time period (27 h), the cell density increased from  
221 approximately OD<sub>600nm</sub> 0.04 to 3.03 for *P. acidilactici* ST31BZ, 0.08 to 4.7 for *P.*  
222 *pentosaceus* ST75BZ and 0.06 to 4.77 for *P. pentosaceus* ST87BZ (Fig. 4a). Moreover,  
223 levels of bacteriocin produced by *P. acidilactici* ST31BZ were gradually increased  
224 during the fermentation process and reached 12800 AU/ml at 15 h and remained stable

225 until the end of the monitored period of 27 h (Fig. 4a). However, bacteriocin produced  
226 by *P. pentosaceus* ST75BZ reached its maximum production levels (6400 AU/ml) at  
227 15h from the beginning of fermentation, remained stable until 18h of fermentation time  
228 and decreased in the next 9 h (Fig. 4b). As expected, a similar bacteriocin production  
229 profile was recorded for both *P. pentosaceus* strains (Fig. 4c).

230

### 231 **Mode of action of bacteriocins produced by *P. pentosaceus***

232 The mechanisms of action of the bacteriocins produced by *P. acidilactici* ST31BZ, *P.*  
233 *pentosaceus* ST75BZ or *P. pentosaceus* ST87BZ was investigated using a growth  
234 inhibition assay, by adding 6400 AU/ml of bacteriocins produced by the strains to early-  
235 logarithmic growing (3-h-old) cultures of *L. monocytogenes* 104, 637 and 711. All three  
236 novel strains inhibited the growth of *Listeria* (Fig. 5), and recovery of viable *L.*  
237 *monocytogenes* from the cultures after 10 and 24 h of growth was not possible,  
238 indicating the killing effect.

239 We investigated cell membrane pore formation using a  $\beta$ -galactosidase leakage  
240 assay. Cells of *L. monocytogenes* 104, 637 and 711 were incubated for 10 minutes with  
241 cell-free supernatants containing 6400 AU/ml of bacteriocin, followed by the addition  
242 of the  $\beta$ -galactosidase substrate and colorimetric product read-out. All  
243 bacteriocin/*Listeria* combinations tested produced a positive result, indicating that the  
244 mechanism of action involves pore formation and the destabilization of the cell  
245 membrane on the test strains.

246

### 247 **Bacteriocin activity spectrum**

248 The cell-free culture supernatants of the three *Pediococcus* spp. was tested for activity  
249 against a panel of different species/strains. The growth of most *E. faecalis*, *E. faecium*,

250 *E. hirae*, *Lc. lactis*, *L. innocua* and *L. monocytogenes*, some of *Lb. casei* and *Str.*  
251 *termophilus* strains was inhibited, indicating a similar spectrum of activity (Fig. 6,  
252 Supplementary Table 5).

253

## 254 **Discussion**

255 Boza is a traditional fermented beverage rich in nutrients, presenting a diverse microbial  
256 composition. Tests with Boza samples from different regions of the Balkan peninsula  
257 have shown that LAB and yeasts are the main microorganisms involved in the  
258 fermentation<sup>1,2</sup>. The present study aimed to characterize the potential the bacteriocin  
259 production by strains isolated from a sample of Boza obtained from a medium scale  
260 manufacture in North-west Bulgaria, using a mixed molecular and functional approach.

261 The screening method allowed us to select 3 bacterial isolates, initially classified  
262 as *Pediococcus* sp. Genome analysis indicated that these three isolates likely belong to  
263 two different *Pediococcus* species: one *P. acidilactii*, and two *P. pentosaceus*. The *P.*  
264 *acidilactici* ST31BZ genome showed similar values of size, GC content, number of  
265 predicted proteins and ribosomal operons as other *P. acidilactici* strains<sup>10,12</sup>. Detected  
266 CRISPR systems are similar to previously described in *P. acidilactici* HN9<sup>13</sup>. A small  
267 plasmid-encoded bacteriocin (~ 9 kb) was detected, such as found in pSMB74<sup>14</sup> and  
268 pCP289<sup>15</sup>. Several studies have shown that strains of *P. pentosaceus* are able to produce  
269 bacteriocins<sup>5</sup>, and in our study we observed the presence of two pediocin-like  
270 bacteriocins, pediocin PA-1 and penocin A, both of which have been previously  
271 reported in *P. pentosaceus* genomic analyses. Antibiotic resistance, prophages, plasmid  
272 and plasmid-associated bacteriocins have been indicated as source of variability at *P.*  
273 *pentosaceus* genomes<sup>9</sup>. Our *P. acidilactici* strain, however, also contains a plasmid-  
274 associated bacteriocin operon (pediocin PA-1), differing from other strains reported in

275 the literature, such as ZPA017 and BCC-1<sup>10,11</sup>. The metabolic characteristics of the  
276 strains obtained indicated a wider metabolic potential for carbohydrate transport for the  
277 *P. acidilactii* transport while the *P. pentosaceus* presented he capability to synthesize  
278 lysine and had quorum sensing related genes.

279 Data from our initial screening indicated that the antimicrobial metabolites  
280 produced by the studied strains were proteinaceous in nature, which prompted us to  
281 further characterize the potential mechanisms of action and the activity range for the  
282 bacteriocins being produced. Although a peptide or protein molecule must be present  
283 for the antimicrobial activity to be detected, this observation does not preclude the  
284 possibility that other moieties may also be present in a larger complex that has the final  
285 bacteriocinogenic effect, as previously reported<sup>16-18</sup>. LAB can produce a variety of  
286 antimicrobial compounds, including diacetyl, hydrogen peroxide, carbon dioxide, low  
287 molecular antimicrobial substances, and organic acids such as phenyl lactic acid<sup>16</sup>. It is  
288 possible that other protein or peptide-derived antibiotics could be produced by these  
289 strains, as we have detected a gene signature for lantibiotic resistance in the genome of  
290 the *P. acidilactici* strain. However, based on the obtained results, we can clearly exclude  
291 the possibility of acid/s or H<sub>2</sub>O<sub>2</sub> to be involved in the antimicrobial properties of the  
292 studied strains.

293 Identification of the genes involved in bacteriocin biosynthesis is an important  
294 part of the characterization of the antimicrobial agent as bacteriocin(s). Bacteriocin  
295 genes can be part of the bacterial genome, and their expression and detection in the cell  
296 free supernatant need to be confirmed. Therefore, a functional approach is important in  
297 evaluating the bacteriocin's activity. Bacteriocins produced by the three selected strains  
298 presented a wide range of activity and were thermostable, maintaining activity after  
299 exposure to different temperatures up to 4 h, including at 121°C for 20 min. Such

300 activity breadth is highly desirable for industrial applications. Most bacteriocins are  
301 molecules smaller than 10 kDa, although some can form complexes of higher molecular  
302 weight<sup>19</sup>. This small size confers stability in harsh conditions. Other reports have  
303 described that bacteriocins produced by different *Pediococcus* spp. are stable at  
304 different pH and after exposure to low and high temperatures<sup>20</sup>. Surfactants and salts  
305 normally have not been reported to negatively influence bacteriocins activity<sup>21</sup>,  
306 however, plantaricin C19 activity was affected by treatment with SDS or Triton X-  
307 100<sup>22</sup>. SDS did not cause loss of activity as has been observed for enterocin EJ97,  
308 bozacin B14 or bacteriocin ST194BZ<sup>20,23</sup>. However, pH can play a role on the stability  
309 of the bacteriocins, as been reported for leucocin F10<sup>24</sup>, Moreover, lactocin NK24  
310 stability was decreased when exposed to 100 °C for 30 min and even was completely  
311 inactivated at 121 °C for 15 min<sup>25</sup>. Similar effect of temperature was reported for  
312 lactocin MMFII, produced by *L. lactis* MMFII<sup>26</sup>. Even nisin, one of the best studied  
313 bacteriocins, was shown to be inactivated after 15 min at 121 °C when incubated at pH  
314 7.0, but not when incubated at pH 3.0<sup>27</sup>.

315 We observed a strong antimicrobial activity of *P. acidilactici* ST31BZ, *P.*  
316 *pentosaceus* ST75BZ and *P. pentosaceus* ST87BZ against a wide range of bacteria  
317 tested. These strains produce bacteriocins with strong antimicrobial activity recorded  
318 against all listeria strains and almost all enterococci evaluated. Nevertheless, no  
319 antimicrobial activity was observed against *S. aureus* and any *Lactobacillus* spp.,  
320 *Leuconostoc* spp., *Samolella* spp. and other *Pediococcus* spp. strains tested. Specific  
321 anti-*Listeria* activity is an attribute reported for different studied pediocins and  
322 particularly pediocin PA-1. Even Heng *et al.*<sup>19</sup> in his classification of bacteriocins,  
323 dedicated a special position for anti-*Listeria* pediocin-like bacteriocins. This specific

324 activity was linked to the conservative amino-acid motive directly involved in the  
325 bacteriocin mode of action and pore formation process<sup>19</sup>.

326 There are reports in the literature that some bacteriocins can be adsorbed onto the  
327 producer's cell surface, and this characteristic can be used to facilitate the purification  
328 process and/or increase the bacteriocin yield for industrial application<sup>28</sup>. In case of the  
329 studied bacteriocins, only low levels of cell-adsorption were recorded, which cannot be  
330 considered relevant in increasing production yield. Similar results have been shown for  
331 pediocins produced by *P. acidilactici* HA-6111-2 and HA-5692-3, respectively, against  
332 *L. innocua* N27 and *E. faecium* HKLHS<sup>21</sup>. Moreover, pediocin PA-1 has been reported  
333 as an effective bactericidal bacteriocin for the control of different *L. monocytogenes*  
334 strains, leading to its proposition as prospective biopreservation for different fermented  
335 food products<sup>21,29,30</sup>. Furthermore, the results obtained from the  $\beta$ -galactosidase leakage  
336 assay confirm that bacteriocins produced by *P. acidilactici* ST31BZ, *P. pentosaceus*  
337 ST75BZ and *P. pentosaceus* ST87BZ likely destabilize the cell membrane inducing the  
338 cytoplasmic leakage and a complete loss of viability for the susceptible strains (data not  
339 shown). Similar approach and results have been reported for bacteriocins produced by  
340 *Lb. plantarum*, *Le. lactis* and *E. faecium*<sup>16</sup>, *Lb. buchneri*<sup>31</sup>, *Lb. plantarum*<sup>32,33</sup> and *Lc.*  
341 *lactis* subsp. *lactis*<sup>34</sup>.

342

### 343 **Conclusion**

344 This study confirms previous ones that have shown boza to be a rich source of LAB of  
345 biotechnological and industrial interest. The bacteriocinogenic potential of the isolated  
346 *P. acidilactici* ST31BZ, *P. pentosaceus* ST75BZ and *P. pentosaceus* ST87BZ strains  
347 reported here include a partial characterization of the mechanism of action and breadth  
348 of susceptible bacterial targets. As most of the fermented traditional food products,

349 Boza is a rich multimicrobial system, were interactions between different microbial  
350 species is essential for the final product's characteristics. Results of whole genome  
351 sequencing analysis of the three selected bacteriocinogenic strains, coupled with  
352 functional assays, highlight their metabolic potential for industrial application, including  
353 production at industrial level of Boza or any other fermented functional food product.

354

## 355 **Materials and methods**

### 356 **Screening for bacteriocinogenic lactic acid bacteria in boza**

357 Boza samples were obtained from a medium-scale manufacturer in North-west  
358 Bulgaria. Isolation of bacteriocinogenic lactic acid bacteria (LAB) from these samples  
359 was done according to the 3-layer method<sup>35</sup>. Samples of boza were submitted to serial  
360 decimal dilutions in sterile saline (0.85% NaCl, Sigma Diagnostics, St. Louis, MO,  
361 USA) and plated on the surface of MRS agar (Difco BD, Franklin Lakes, NJ, USA)  
362 plates. After addition of a layer of 1.0% agar (Difco), the plates were incubated for 48 h  
363 at 37°C. The colonies were counted and plates with well isolated colonies were added of  
364 an extra layer of BHI agar (Difco) (BHI supplemented with 1.0% agar) containing *L.*  
365 *monocytogenes* 104 or *E. faecium* ATCC 19434 (10<sup>5</sup> CFU/ml). Plates were incubated  
366 for additional 24 h and colonies with visible inhibition zones were transferred to new  
367 BHI and incubated at 37 °C for 24 h. The cultures were checked for purity by streaking  
368 on MRS agar. Individual colonies on MRS agar were submitted to Gram-staining and  
369 catalase and oxidase tests. Presumed bacteriocin producing LAB and other  
370 microorganisms used as target organisms were stored at -80 °C in MRS or BHI added of  
371 20% glycerol.

372

### 373 **Identification of the antimicrobial metabolite produced by the selected strains**

374 The isolates were grown in MRS broth at 37 °C for 24 h, and submitted to  
375 centrifugation (6 000 xg, 10 min, 4 °C) for obtention of cell free supernatants (CFS).  
376 After adjustment of the pH to 5.0-6.5 with 1M NaOH, the CFS were heated for 10 min  
377 at 80°C to eliminate potential inhibitory effect of organic acids and to inactivate  
378 hydrogen peroxide and proteolytic enzymes in the medium. Ten microliters of treated  
379 CFS were spotted on the surface on plates containing BHI supplemented with 1.0% agar  
380 plates containing 10<sup>5</sup> CFU/ml *L. monocytogenes* 104 or *E. faecium* ATCC 19434, used  
381 as target test micro-organisms. Plates were incubated at 37°C for 24 h and presence of  
382 growth inhibition zones wider than 2 mm was considered evidence for potential  
383 bacteriocin production (Supplementary Table 6)

384 The proteinaceous nature of the antimicrobial substances produced by the isolates  
385 was investigated in the cell free supernatants by treatment with Proteinase K, pepsin and  
386 pronase (all from Sigma), as described before<sup>35</sup>. Antimicrobial activity and the effect of  
387 temperature (30, 60, 120 and 240 min at 8, 25, 30, 37, 45, 60, 80 and 100°C, and 20 min  
388 at 121°C), pH (2.0, 4.0, 6.0, 8.0 and 10.0) and selected chemicals (NaCl, SDS, Tween  
389 20, and Tween 80) on stability of produced bacteriocins were evaluated according dos  
390 Santos *et al.*<sup>35</sup>. Tests were performed with *L. monocytogenes* 104 and *E. faecium* ATCC  
391 19434 as targets. All experiments were performed at least in duplicate in two  
392 independent occasions.

393

#### 394 **Identification of isolates**

395 The strains were identified based on recommended morphological, biochemical and  
396 physiological tests, according the Bergey's Manual<sup>36</sup> and 16S rRNA partial gene  
397 sequencing. Cultures were prepared in 50 ml MRS broth for 24 h at 37°C, cells  
398 collected by centrifugation (6000 xg, 10 min, 4°C) and DNA extracted using the ZR



399 Fungal/Bacterial DNA Kit (Zymo Research, Irvine, CA, USA), following the  
400 manufacturer's protocol. The obtained DNA was quantified using a NanoDrop (Thermo  
401 Fisher Scientific, Waltham, MA, USA). RAPD-PCR with Primers OPL-14 (5'-GTG  
402 ACA GGC T-3') and OPL-20 (5'-TGG TGG ACC A-3') was used for differentiation  
403 between the studied isolates<sup>37</sup>. Based on the RAPD profiles, three strains were selected  
404 and their DNAs subjected to PCR to amplify a region of 16S rRNA<sup>37</sup>, and further  
405 sequenced in the Center for Human Genome Studies (Institute of Biomedical Sciences,  
406 University of São Paulo, São Paulo, SP, Brazil). For identifications, the obtained  
407 sequences were analyzed in the Basic Local Alignment Search Tool (BLAST,  
408 GenBank, National Center for Biotechnology Information, Bethesda, MD, USA).

409

#### 410 **Genomic analysis**

411 Three isolates were selected for Whole Genome Sequencing. The DNA was extracted  
412 from cultures grown in MRS broth at 37°C for 24 h, using the ZR Fungal/Bacterial  
413 DNA Kit (Zymo Research). Extracted DNA was used for library preparation with  
414 Nextera DNA Flex Library Prep Kit (Illumina, San Diego, CA, USA). Libraries were  
415 sequenced on NextSeq Genome Sequencer (Illumina) with a NextSeq 500/550 Mid  
416 Output Kit v2.5 at Core Facility for Scientific Research – University of Sao Paulo  
417 (USP) (CEFAP-USP).

418 The obtained reads were processed with the software package BBTools  
419 (<https://jgi.doe.gov/data-and-tools/bbtools/>). Reads were trimmed for Nextera adapters  
420 and filtered to have an average Q-score < 15. Trimmed reads from the three strains were  
421 assembled *de novo* with SPAdes 3.13.0<sup>38</sup>. ORFs were predicted for all assembled  
422 contigs with Prokka pipeline<sup>39</sup>. Scaffolds were uploaded to MiGA to access genome  
423 assembly completeness and to identify the closest bacterial strain to each assembled

424 genome<sup>40</sup>. tRNA were detected with ARAGORN<sup>41</sup> and rRNAs with Barrnap  
425 (<https://github.com/tseemann/barrnap>). CRISPR regions were detected with PILER-  
426 CR<sup>42</sup> and CRISPRCasFinder<sup>43</sup>. Plasmid searches were made using metagenomic  
427 plasmid function (metaplasmidspades.py)<sup>44</sup> and the presence of plasmid genes verified  
428 using the script viralVerify<sup>45</sup> with -p argument. Bacteriocins genes were detected with  
429 BAGEL4<sup>46</sup> and antibiotic resistances genes using ARIBA<sup>47</sup> with quality filtered reads  
430 and CARD database<sup>48</sup>.

431 Pangenomic analysis of *Pediococcus* isolates were done using anvio v6.1<sup>49</sup> with  
432 the pangenomic workflow. Our objective was to compare the similarity of isolates and  
433 reference genomes. We focused on *P. acidilactici* and *P. pentosaceus* species. All  
434 sequencing data generated in this study can be accessed from GenBank Database at  
435 BioProject PRJNA731169. The genome of isolate ST31BZ was compared to five  
436 reference genomes of *P. acidilactici* species available on NCBI (BioProject numbers:  
437 PRJNA312971, PRJNA357663, PRJNA422477, PRJNA386762, and PRJNA386761).  
438 The genomes of isolates ST75BZ and ST87BZ were compared to four references  
439 genomes of *P. pentosaceus* species available on NCBI (PRJNA399825, PRJNA398,  
440 PRJNA376813, and PRJNA390207).

441

#### 442 **Spectrum of activity**

443 The selected bacteriocinogenic strains were grown in MRS at 37°C for 24 h and cell  
444 free supernatants were obtained as described before. Inhibitory effectiveness of the  
445 produced bacteriocins was evaluated against several LAB, selected food borne  
446 pathogens and some Gram-negative organisms, listed in Supplementary Table 5. The  
447 growth conditions (culture medium and temperature) were according to the  
448 recommended for each test microorganism. Test microorganisms were grown overnight

449 and incorporated in appropriate medium, supplemented with 1.0% agar, at final  
450 concentration around  $10^5$  CFU/ml. Studied bacteriocins were spotted (10  $\mu$ l) on the  
451 surface and plates cultured for 24 h at recommended growth temperature. Zones of  
452 inhibition, larger than 2 mm were considered as positive result.

453

#### 454 **Growth and bacteriocin production dynamics**

455 The selected strains were grown in 20 ml MRS broth (Difco) at 25 °C, 30 °C or 37 °C  
456 for 24 h. Cell free supernatant was prepared as described before and bacteriocin activity  
457 determined against *L. monocytogenes* 104 and expressed in AU/ml. After selection the  
458 optimal temperature for bacteriocin production, the dynamic of the production was  
459 evaluated as follows: overnight cultures were prepared in 300 mL MRS broth (Difco) at  
460 37°C, and optical density at 600 nm and pH changes were monitored hourly for 24 h.  
461 Production of bacteriocin(s) was measuring the antimicrobial activity against *L.*  
462 *monocytogenes* 104, 637 and 711 every three hours (expressed as AU/ml). Experiments  
463 were performed in two independent occasions.

464

#### 465 **Inhibitory effect of bacteriocins evaluated via cell lysis assay**

466 For evaluation of the effect of studied bacteriocin on actively growing *L.*  
467 *monocytogenes* 104, 637 and 711, the approach proposed by de Castilho *et al.*<sup>50</sup> was  
468 followed. For the experiment, 300 ml BHI broth was inoculated with 1% (v/v) of *L.*  
469 *monocytogenes* 104, 637 or 711 and incubated for 3 h at 37°C. 30 ml filter-sterilized  
470 (0.22  $\mu$ m Millipore sterile filters, Burlington, MA, USA) cell-free supernatant of each  
471 bacteriocinogenic strain was added to the culture and changes on the turbidity were  
472 monitored at OD<sub>600nm</sub> every hour for 10 h. In addition, bacterial growth was determined  
473 after 24 h of incubation, to check for viable cells. The numbers of CFU/ml were

474 determined after 10 h and 24 h of cultivation for all assays, i.e., with added bacteriocin  
475 and controls (without added bacteriocin), by plating on BHI supplemented with 2% agar  
476 and incubation at 37°C for 48 h. Experiments were performed in duplicate in 2  
477 independent occasions.

478

#### 479 **β-galactosidase assay**

480 The capability of bacteriocin(s) to induce pore formation in the target strains was  
481 tested determining the level of β-galactosidase secreted from damaged cells. Cells from  
482 20 ml of actively growing, log-phase cultures of *L. monocytogenes* 104, 637 and 711  
483 were harvested, washed twice with 20 mL 0.03 M sodium phosphate buffer  
484 (K<sub>2</sub>HPO<sub>4</sub>/KH<sub>2</sub>PO<sub>4</sub>, pH 6.5) and the pellet re-suspended into 10 ml of the same buffer.  
485 Two ml of the cell suspensions were treated with equal volumes of each studied  
486 bacteriocin to yield final concentrations of 6 400 AU/ml. After 10 min at 37°C, 0.2 mL  
487 0.1 M ONPG (O-nitrophenyl-β-D-galactopyranoside, Sigma), dissolved in 0.03 M  
488 sodium phosphate buffer (pH 6.8), was added to each of the cell suspensions and the  
489 cells incubated for additional 10 min at 37°C. The β-galactosidase reaction was stopped  
490 by adding 2.0 ml 0.1 M sodium carbonate. The cells were harvested by centrifugation  
491 (10 000 x g, 15 min, 25°C) and absorbance readings of cell-free supernatants recorded at  
492 420 nm. Cultures of *L. monocytogenes* 104, 637 and 711 not treated with the studied  
493 bacteriocins were used as controls.

494

#### 495 **Adsorption to cell surface of producer**

496 The capability of the studied bacteriocins to adsorb to the producer cells was tested  
497 according to Yang *et al.*<sup>28</sup>, using *L. monocytogenes* 104. Experiments were performed in  
498 a triplicate.

499 **Vizualization.**

500 Circular representations of the isolate genomes were made using CGView Server<sup>51</sup>. The  
501 figures were made using the statistical software R<sup>52</sup>, with package ggplot2<sup>53</sup>.

502 **Data Availability**

503 Genomes assembled and their SRA sequencing data are available in the NCBI under  
504 BioProject PRJNA731169.

505 **References**

- 506 1. Leblanc, J. G. & Todorov, S. D. Bacteriocins producing lactic acid bacteria  
507 isolated from Boza, a traditional fermented beverage from Balkan Peninsula –  
508 from isolation to application. in *Science against microbial pathogens:  
509 communicating current research and technological advances* (ed. Méndez-Vilas,  
510 A.) 1311–1320 (Formatex Research Center, 2011).
- 511 2. Todorov, S. D. & Holzapfel, W. H. Traditional cereal fermented foods as sources  
512 of functional microorganisms. in *Advances in Fermented Foods and Beverages*  
513 123–153 (Elsevier, 2015). doi:10.1016/B978-1-78242-015-6.00006-2
- 514 3. Marco, M. L. *et al.* The International Scientific Association for Probiotics and  
515 Prebiotics (ISAPP) consensus statement on fermented foods. *Nat. Rev.  
516 Gastroenterol. Hepatol.* **18**, 196–208 (2021).
- 517 4. Chikindas, M. L., Weeks, R., Drider, D., Chistyakov, V. A. & Dicks, L. M.  
518 Functions and emerging applications of bacteriocins. *Curr. Opin. Biotechnol.* **49**,  
519 23–28 (2018).
- 520 5. Todorov, S. D., de Melo Franco, B. D. G. & Tagg, J. R. Bacteriocins of Gram-  
521 positive bacteria having activity spectra extending beyond closely-related  
522 species. *Benef. Microbes* **10**, 315–328 (2019).
- 523 6. Todorov, S. D. & Chikindas, M. L. Lactic Acid Bacteria Bacteriocins and their

- 524 Impact on Human Health. in *Lactic Acid Bacteria* (eds. Albuquerque, M. A. C.,  
525 LeBlanc, A., LeBlanc, J. & Bedani, R.) 79–92 (CRC Press, 2020).  
526 doi:10.1201/9780429422591-5
- 527 7. Wachsman, M. B. *et al.* Enterocin CRL35 inhibits late stages of HSV-1 and  
528 HSV-2 replication in vitro. *Antiviral Res.* **58**, 17–24 (2003).
- 529 8. Torres, N. I. *et al.* Safety, Formulation and In Vitro Antiviral Activity of the  
530 Antimicrobial Peptide Subtilosin Against Herpes Simplex Virus Type 1.  
531 *Probiotics Antimicrob. Proteins* **5**, 26–35 (2013).
- 532 9. Jiang, J. *et al.* Comparative Genomics of *Pediococcus pentosaceus* Isolated From  
533 Different Niches Reveals Genetic Diversity in Carbohydrate Metabolism and  
534 Immune System. *Front. Microbiol.* **11**, 1–22 (2020).
- 535 10. Liu, H. *et al.* Effects of dietary supplementation with *Pediococcus acidilactici*  
536 ZPA017 on reproductive performance, fecal microbial flora and serum indices in  
537 sows during late gestation and lactation. *Asian-Australasian J. Anim. Sci.* **33**,  
538 120–126 (2020).
- 539 11. Lei, Z. *et al.* Transcriptomic Analysis of Xylan Oligosaccharide Utilization  
540 Systems in *Pediococcus acidilactici* Strain BCC-1. *J. Agric. Food Chem.* **66**,  
541 4725–4733 (2018).
- 542 12. Porto, M. C. W., Kuniyoshi, T. M., Azevedo, P. O. S., Vitolo, M. & Oliveira, R.  
543 P. S. *Pediococcus* spp.: An important genus of lactic acid bacteria and pediocin  
544 producers. *Biotechnol. Adv.* **35**, 361–374 (2017).
- 545 13. Surachat, K., Kantachote, D., Deachamag, P. & Wonglapsuwan, M. Genomic  
546 Insight into *Pediococcus acidilactici* HN9 , a Potential Probiotic Strain Isolated  
547 from the Traditional Thai-Style Fermented Beef Nhang. *Microorganisms* **9**,  
548 (2021).

- 549 14. Motlagh, A., Bukhtiyarova, M. & Ray, B. Complete nucleotide sequence of  
550 pSMB 74, a plasmid encoding the production of pediocin AcH in *Pediococcus*  
551 *acidilactici*. *Lett. Appl. Microbiol.* **18**, 305–312 (1994).
- 552 15. Kaur, B. & Balgir, P. Pediocin CP2GENE Localisation To Plasmid PCP289 Of  
553 *Pediococcus Acidilactici* MTCC 5101. *Internet J. Microbiol.* **3**,  
554 1–7 (2012).
- 555 16. Todorov, S. D. Diversity of bacteriocinogenic lactic acid bacteria isolated from  
556 boza, a cereal-based fermented beverage from Bulgaria. *Food Control* **21**, 1011–  
557 1021 (2010).
- 558 17. Lewus, C. B., Sun, S. & Montville, T. J. Production of an Amylase-Sensitive  
559 Bacteriocin by an Atypical *Leuconostoc paramesenteroides* Strain. *Appl.*  
560 *Environ. Microbiol.* **58**, 143 (1992).
- 561 18. Keppler, P., Holz, U., Thielemann, F. W. & Meinig, R. Locked Posterior  
562 Dislocation of the Shoulder: Treatment Using Rotational Osteotomy of the  
563 Humerus. *J. Orthop. Trauma* **8**, 286–292 (1994).
- 564 19. Heng, N. C. K., Wescombe, P. A., Burton, J. P., Jack, R. W. & Tagg, J. R. The  
565 Diversity of Bacteriocins in Gram-Positive Bacteria. in *Bacteriocins* 45–92  
566 (Springer Berlin Heidelberg, 2007). doi:10.1007/978-3-540-36604-1\_4
- 567 20. Todorov, S. D. & Dicks, L. M. T. Pediocin ST18, an anti-listerial bacteriocin  
568 produced by *Pediococcus pentosaceus* ST18 isolated from boza, a traditional  
569 cereal beverage from Bulgaria. *Process Biochem.* **40**, 365–370 (2005).
- 570 21. Albano, H. *et al.* Characterization of two bacteriocins produced by *Pediococcus*  
571 *acidilactici* isolated from “Alheira”, a fermented sausage traditionally produced  
572 in Portugal. *Int. J. Food Microbiol.* **116**, 239–247 (2007).
- 573 22. Atrih, A., Rekhif, N., Moir, A. J. ., Lebrihi, A. & Lefebvre, G. Mode of action,

- 574 purification and amino acid sequence of plantaricin C19, an anti-*Listeria*  
575 bacteriocin produced by *Lactobacillus plantarum* C19. *Int. J. Food Microbiol.* **68**,  
576 93–104 (2001).
- 577 23. Gálvez, A. *et al.* Isolation and characterization of enterocin EJ97, a bacteriocin  
578 produced by *Enterococcus faecalis* EJ97. *Arch. Microbiol.* **171**, 59–65 (1998).
- 579 24. Parente, E., Moles, M. & Ricciardi, A. Leucocin F10, a bacteriocin from  
580 *Leuconostoc carnosum*. *Int. J. Food Microbiol.* **33**, 231–243 (1996).
- 581 25. Lee, N.-K. & Paik, H.-D. Partial characterization of lacticin NK24, a newly  
582 identified bacteriocin of *Lactococcus lactis* NK24 isolated from Jeot-gal. *Food*  
583 *Microbiol.* **18**, 17–24 (2001).
- 584 26. Ferchichi, M., Frère, J., Mabrouk, K. & Manai, M. Lactococcin MMFII, a novel  
585 class IIa bacteriocin produced by *Lactococcus lactis* MMFII, isolated from a  
586 Tunisian dairy product. *FEMS Microbiol. Lett.* **205**, 49–55 (2001).
- 587 27. Noonpakdee, W., Santivarangkna, C., Jumriangrit, P., Sonomoto, K. & Panyim,  
588 S. Isolation of nisin-producing *Lactococcus lactis* WNC 20 strain from nham, a  
589 traditional Thai fermented sausage. *Int. J. Food Microbiol.* **81**, 137–45 (2003).
- 590 28. Yang, R., Johnson, M. C. & Ray, B. Novel method to extract large amounts of  
591 bacteriocins from lactic acid bacteria. *Appl. Environ. Microbiol.* **58**, 3355 (1992).
- 592 29. Loessner, M., Guenther, S., Steffan, S. & Scherer, S. A Pediocin-Producing  
593 *Lactobacillus plantarum* Strain Inhibits *Listeria monocytogenes* in a Multispecies  
594 Cheese Surface Microbial Ripening Consortium. *Appl. Environ. Microbiol.* **69**,  
595 1854–1857 (2003).
- 596 30. Osmanagaoglu, O., Kiran, F. & Nes, I. F. A probiotic bacterium, *Pediococcus*  
597 *pentosaceus* OZF, isolated from human breast milk produces pediocin Ach/PA-  
598 1. *African J. Biotechnol.* **10**, 2070–2079 (2011).



- 599 31. Yıldırım, Z., Avşar, Y. K. & Yıldırım, M. Factors affecting the adsorption of  
600 buchnericin LB, a bacteriocin produced by *Lactocobacillus buchneri*. *Microbiol.*  
601 *Res.* **157**, 103–107 (2002).
- 602 32. Todorov, S. D. & Dicks, L. M. T. Screening for bacteriocin-producing lactic acid  
603 bacteria from boza, a traditional cereal beverage from Bulgaria: Comparison of  
604 the bacteriocins. *Process Biochem.* **41**, 11–19 (2006).
- 605 33. Bhunia, A. K., Johnson, M. C., Ray, B. & Kalchayanand, N. Mode of action of  
606 pediocin AcH from *Pediococcus acidilactici* H on sensitive bacterial strains. *J.*  
607 *Appl. Bacteriol.* **70**, 25–33 (1991).
- 608 34. Todorov, S. D., Botes, M., Danova, S. T. & Dicks, L. M. T. Probiotic properties  
609 of *Lactococcus lactis* ssp. *lactis* HV219, isolated from human vaginal secretions.  
610 *J. Appl. Microbiol.* **103**, 629–639 (2007).
- 611 35. dos Santos, K. M. O. *et al.* Exploring Beneficial/Virulence Properties of Two  
612 Dairy-Related Strains of *Streptococcus infantarius* subsp. *infantarius*. *Probiotics*  
613 *Antimicrob. Proteins* **12**, 1524–1541 (2020).
- 614 36. De Vos, P. *et al.* *Bergey's Manual of Systematic Bacteriology*. (Wiley Publishing  
615 Group, 2009).
- 616 37. de Moraes, G. M. D. *et al.* Functional Properties of *Lactobacillus mucosae*  
617 Strains Isolated from Brazilian Goat Milk. *Probiotics Antimicrob. Proteins* **9**,  
618 235–245 (2017).
- 619 38. Bankevich, A. *et al.* SPAdes: A New Genome Assembly Algorithm and Its  
620 Applications to Single-Cell Sequencing. *J. Comput. Biol.* **19**, 455–477 (2012).
- 621 39. Seemann, T. Prokka: Rapid prokaryotic genome annotation. *Bioinformatics* **30**,  
622 2068–2069 (2014).
- 623 40. Rodriguez-R, L. M. *et al.* The Microbial Genomes Atlas (MiGA) webserver:

- 624 Taxonomic and gene diversity analysis of Archaea and Bacteria at the whole  
625 genome level. *Nucleic Acids Res.* **46**, W282–W288 (2018).
- 626 41. Laslett, D. & Canback, B. ARAGORN, a program to detect tRNA genes and  
627 tmRNA genes in nucleotide sequences. *Nucleic Acids Res.* **32**, 11–16 (2004).
- 628 42. Edgar, R. C. PILER-CR: Fast and accurate identification of CRISPR repeats.  
629 *BMC Bioinformatics* **8**, 1–6 (2007).
- 630 43. Couvin, D. *et al.* CRISPRCasFinder, an update of CRISPRFinder, includes a  
631 portable version, enhanced performance and integrates search for Cas proteins.  
632 *Nucleic Acids Res.* **46**, W246–W251 (2018).
- 633 44. Antipov, D., Raiko, M., Lapidus, A. & Pevzner, P. A. Plasmid detection and  
634 assembly in genomic and metagenomic data sets. *Genome Res.* **29**, 961–968  
635 (2019).
- 636 45. Antipov, D., Raiko, M., Lapidus, A. & Pevzner, P. A. Metaviral SPAdes:  
637 Assembly of viruses from metagenomic data. *Bioinformatics* **36**, 4126–4129  
638 (2020).
- 639 46. van Heel, A. J. *et al.* BAGEL4: a user-friendly web server to thoroughly mine  
640 RiPPs and bacteriocins. *Nucleic Acids Res.* **46**, W278–W281 (2018).
- 641 47. Hunt, M. *et al.* ARIBA: Rapid antimicrobial resistance genotyping directly from  
642 sequencing reads. *Microb. Genomics* **3**, 1–11 (2017).
- 643 48. Alcock, B. P. *et al.* CARD 2020: Antibiotic resistome surveillance with the  
644 comprehensive antibiotic resistance database. *Nucleic Acids Res.* **48**, D517–D525  
645 (2020).
- 646 49. Eren, A. M. *et al.* Anvi'o: an advanced analysis and visualization platform for  
647 'omics data. *PeerJ* **3**, e1319 (2015).
- 648 50. Castilho, N. P. A., Colombo, M., Oliveira, L. L. de, Todorov, S. D. & Nero, L. A.

649 Lactobacillus curvatus UFV-NPAC1 and other lactic acid bacteria isolated from  
650 calabresa, a fermented meat product, present high bacteriocinogenic activity  
651 against *Listeria monocytogenes*. *BMC Microbiol.* **19**, 63 (2019).

652 51. Stothard, P., Grant, J. R. & Van Domselaar, G. Visualizing and comparing  
653 circular genomes using the CGView family of tools. *Brief. Bioinform.* **20**, 1576–  
654 1582 (2018).

655 52. R Development Core Team. R: A language and environment for statistical  
656 computing. (2020).

657 53. Wickham, H. *ggplot2*. (Springer International Publishing, 2016).  
658 doi:10.1007/978-3-319-24277-4

## 659 **Acknowledgements**

660 We would like to thank all members of the Food Microbiology Laboratory for their  
661 support during the experiments. This work was supported by the Sao Paulo Research  
662 Foundation (FAPESP), grant: 2013/07914-8, and the Coordenação de Aperfeiçoamento  
663 de Pessoal de Nível Superior - Brasil (CAPES) - Finance Code 001.

## 664 **Contributions**

665 Microbiology was performed by S.D.T. Sample processing and sequencing were  
666 performed by L.L.Q and G.A.L. Genome and statistical analyses were performed by  
667 L.L.Q and C.H. Manuscript was prepared by L.L.Q, G.A.L. C.H., and S.D.T. Study  
668 design was performed by C.H., and S.D.T. Contributed funding was made by  
669 B.D.G.M.F., C.H., and S.D.T. All authors reviewed and approved the manuscript.

670

671 **Figure captions**

672 **Fig. 1 Genome and plasmids from two novel strains of LAB. a.** *P. acidilactici*  
673 ST31BZ and its two plasmids. **b.** *P. pentosaceus* ST75BZ and ST87BZ and its plasmid.  
674 Representation is not drawn to scale to allow a good visual representation of the  
675 plasmid sequences.

676 **Fig. 2 Putative bacteriocin gene clusters identified using BAGEL 4. a.** Putative  
677 bacteriocin found pST31BZ-2 from *P. acidilactici* ST31BZ; **b.** Putative bacteriocin  
678 found pST75BZ and pST87BZ-1 from *Pediococcus pentosaceus* ST75BZ and ST87BZ;  
679 **c.** Putative bacteriocin found in genome of *Pediococcus pentosaceus* ST75BZ and  
680 ST87BZ.

681 **Fig. 3 Pangenomic comparison. a.** Isolate of *Pediococcus acidilactici* ST31BZ, **b.**  
682 *Pediococcus pentosaceus* ST75BZ and *Pediococcus pentosaceus* ST87BZ using  
683 Anvi'o. ST31BZ was compared with five complete genomes of *Pediococcus*  
684 *acidilactici* (strains ZPA017, BCC1, PB22, SRCM100424, and SRCM100313).  
685 ST75BZ and ST87BZ were compared with four complete genomes of *Pediococcus*  
686 *pentosaceus* (strains SS1-3, ATCC 25745, KCCM 40703, and SRCM 100194).  
687 Genomes of both pangenomes were organized based on gene cluster presence/absence.  
688

689 **Fig. 4 Bacterial growth.** Growth changes were monitored as changes in OD<sub>600 nm</sub> (-●-),  
690 pH (-▲-) and the production of bacteriocins evaluated (mean from 3 experiments is  
691 shown), against *Listeria monocytogenes* 104 (dark-red bar), *Listeria monocytogenes* 637  
692 (grey bar) and *Listeria monocytogenes* 711 (mustard bar) expressed as AU/mL  
693 presented as histogram for **a.** *Pediococcus acidilactici* ST31BZ, **b.** *Pediococcus*  
694 *pentosaceus* ST75BZ and **c.** *Pediococcus pentosaceus* ST87BZ.

695 **Fig. 5 The effect of bacteriocin produced.** Bacteriocin produced by *Pediococcus*  
696 *acidilactici* ST31BZ, *Pediococcus pentosaceus* ST75BZ and *Pediococcus pentosaceus*  
697 ST87BZ (mean from 3 experiments is shown), on the growth of **a.** *Listeria*  
698 *monocytogenes* 104, **b.** *Listeria monocytogenes* 637 and **c.** *Listeria monocytogenes* 711.  
699 Cultures received a standardized bacteriocin dose at 3h post culture start. Colors  
700 indicate the origin of the bacteriocin added: *P. acidilactici* ST31BZ - green (-▲-), *P.*  
701 *pentosaceus* ST75BZ blue (-■-), and *P. pentosaceus* ST87BZ purple (-◆-). Negative  
702 control is shown in red (-●-).

703 **Fig. 6 Bacterial susceptibility test results.** The activity spectrum against tested strains  
704 is presented as a heatmap where colors indicate the proportion of susceptible strains  
705 from the total of tested strains (shown in parenthesis after the species name).

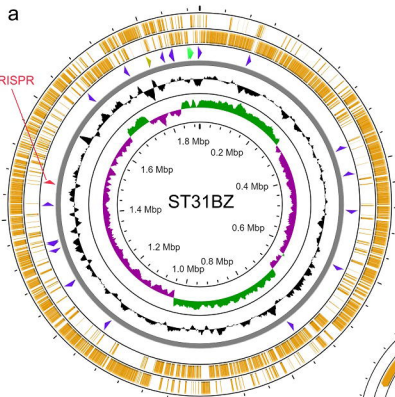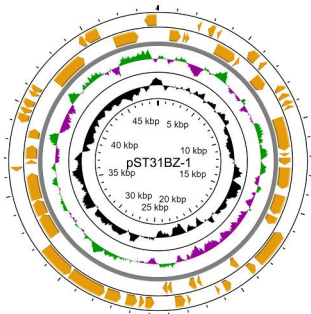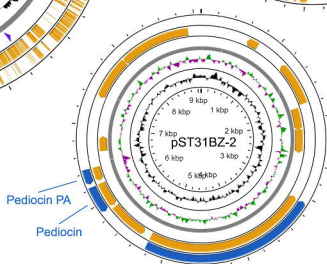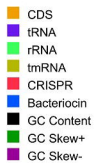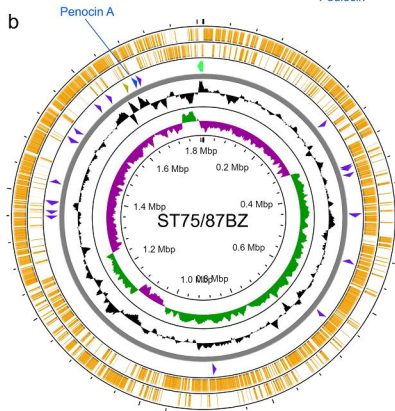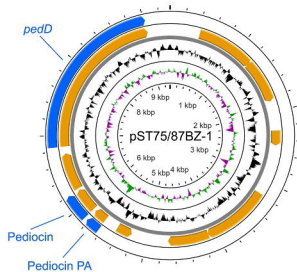

- Genenames
- Predicted promoters
- Predicted terminators
- Show or hide small ORFs

- No function determined
- Blast hit with UniRef90
- Core Peptide
- Modification
- Immunity / Transport
- Regulation
- Transport & Leader cleavage
- Protease

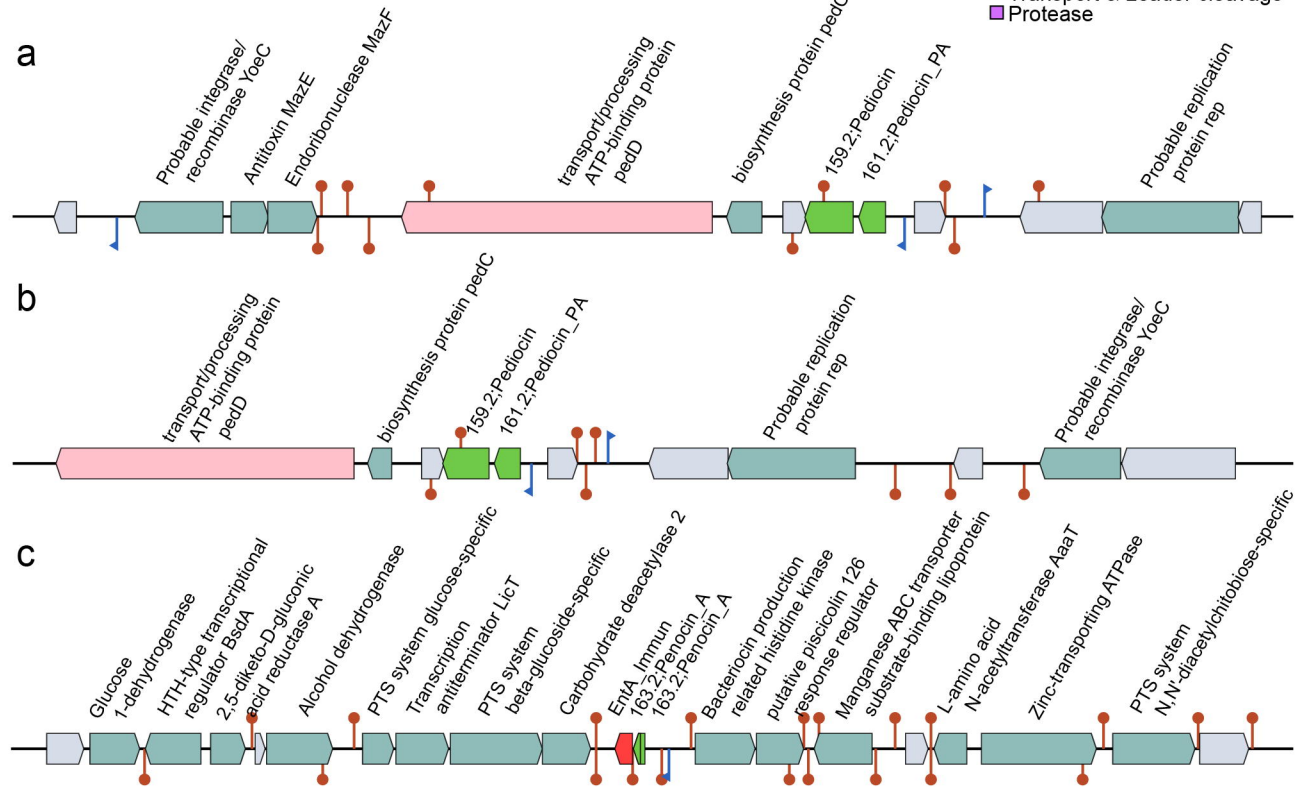

**a**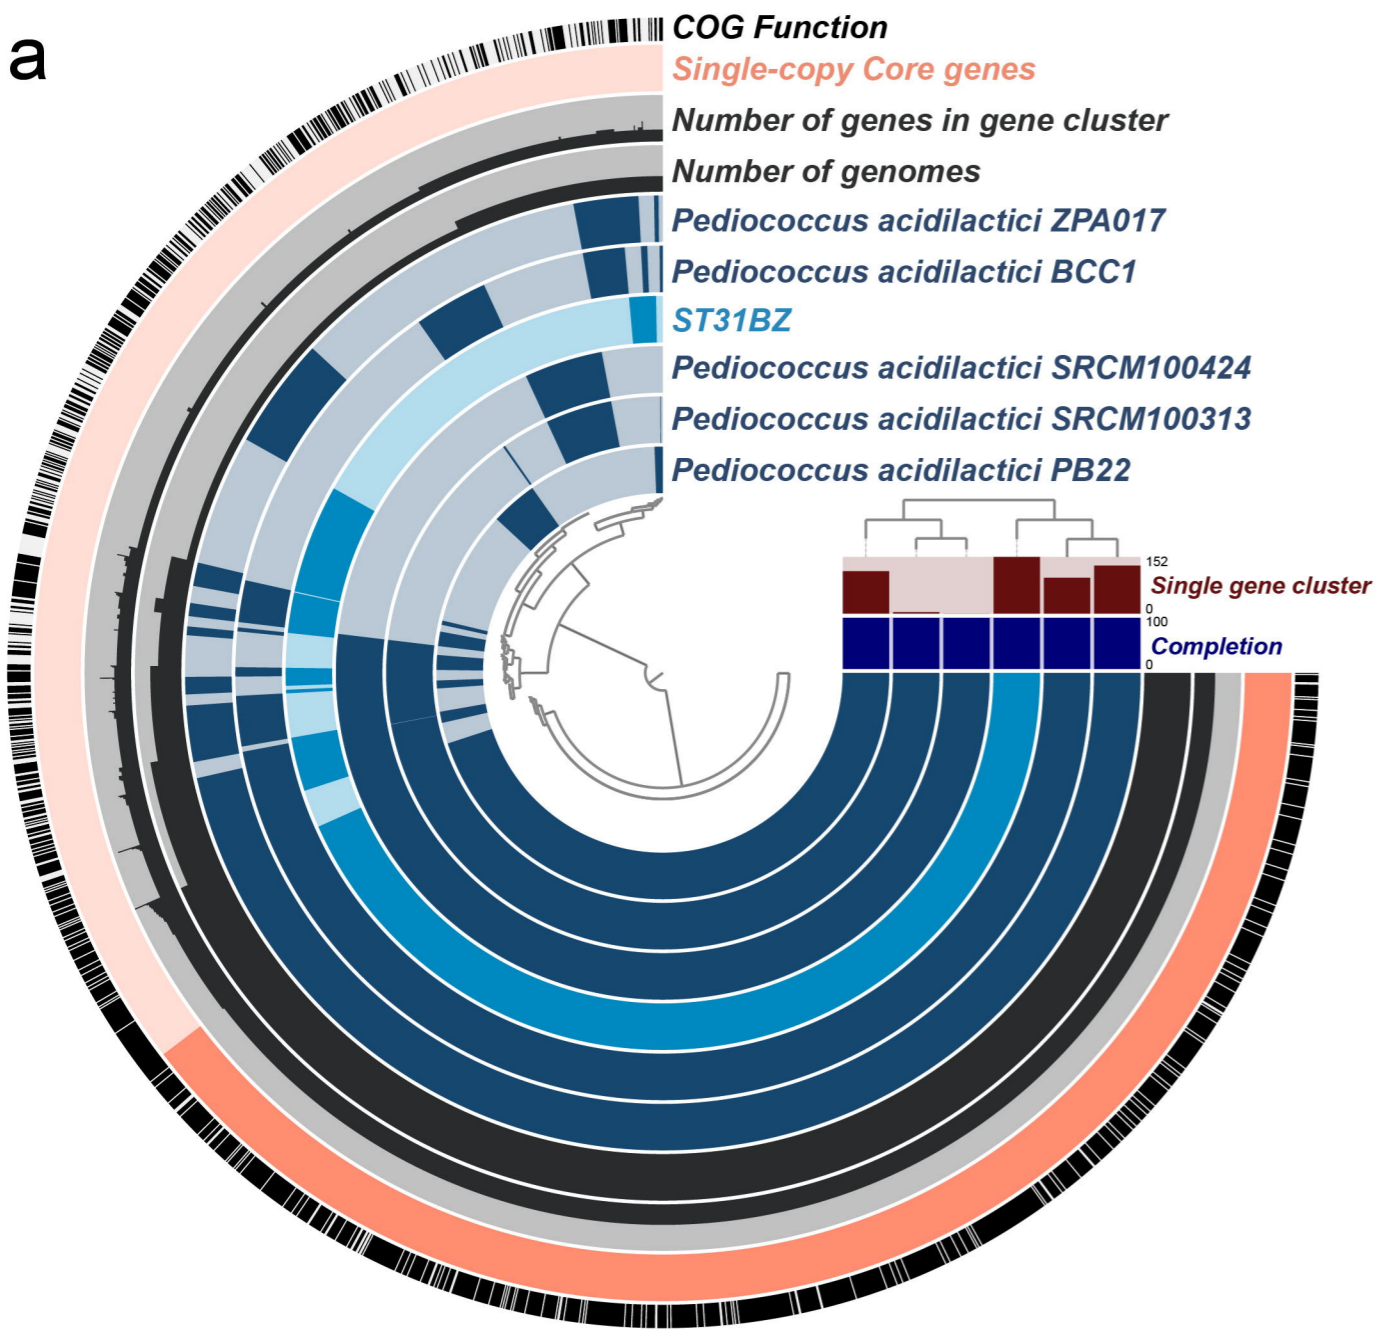

COG FUNCTION ■ KNOWN (1892) □ UNKNOWN (683)

**b**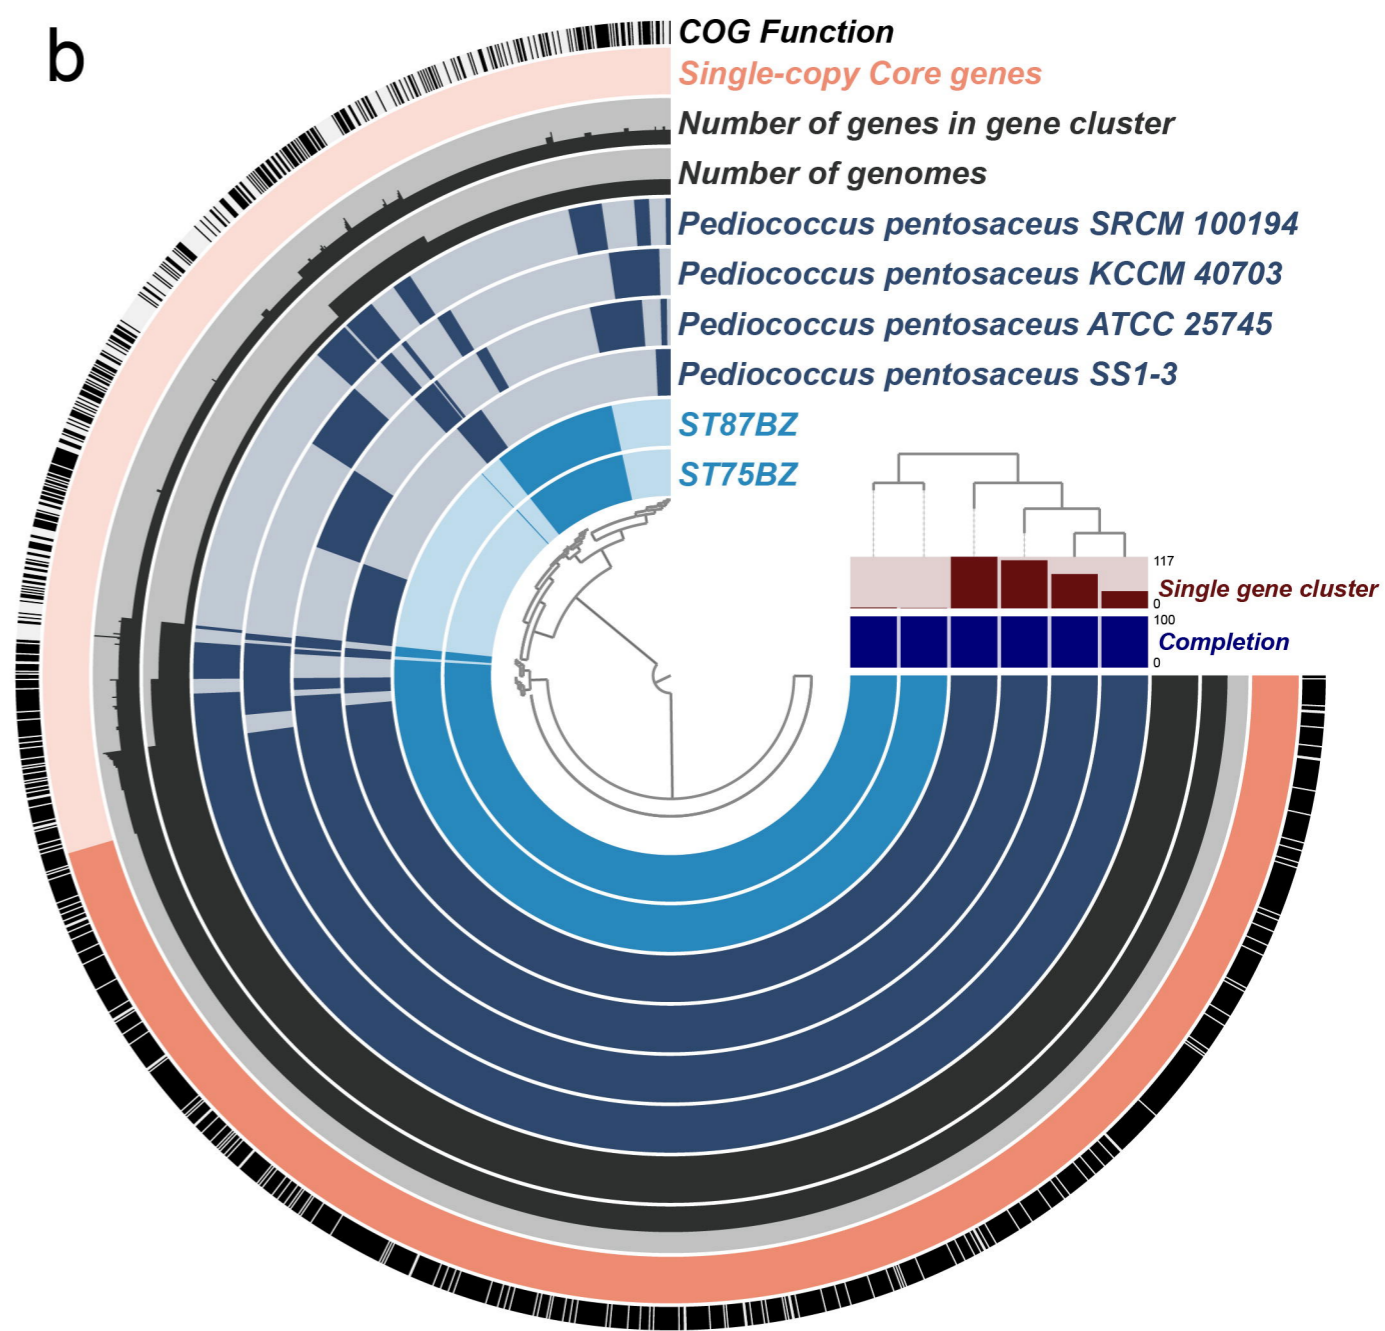

COG FUNCTION ■ KNOWN (1682) □ UNKNOWN (585)



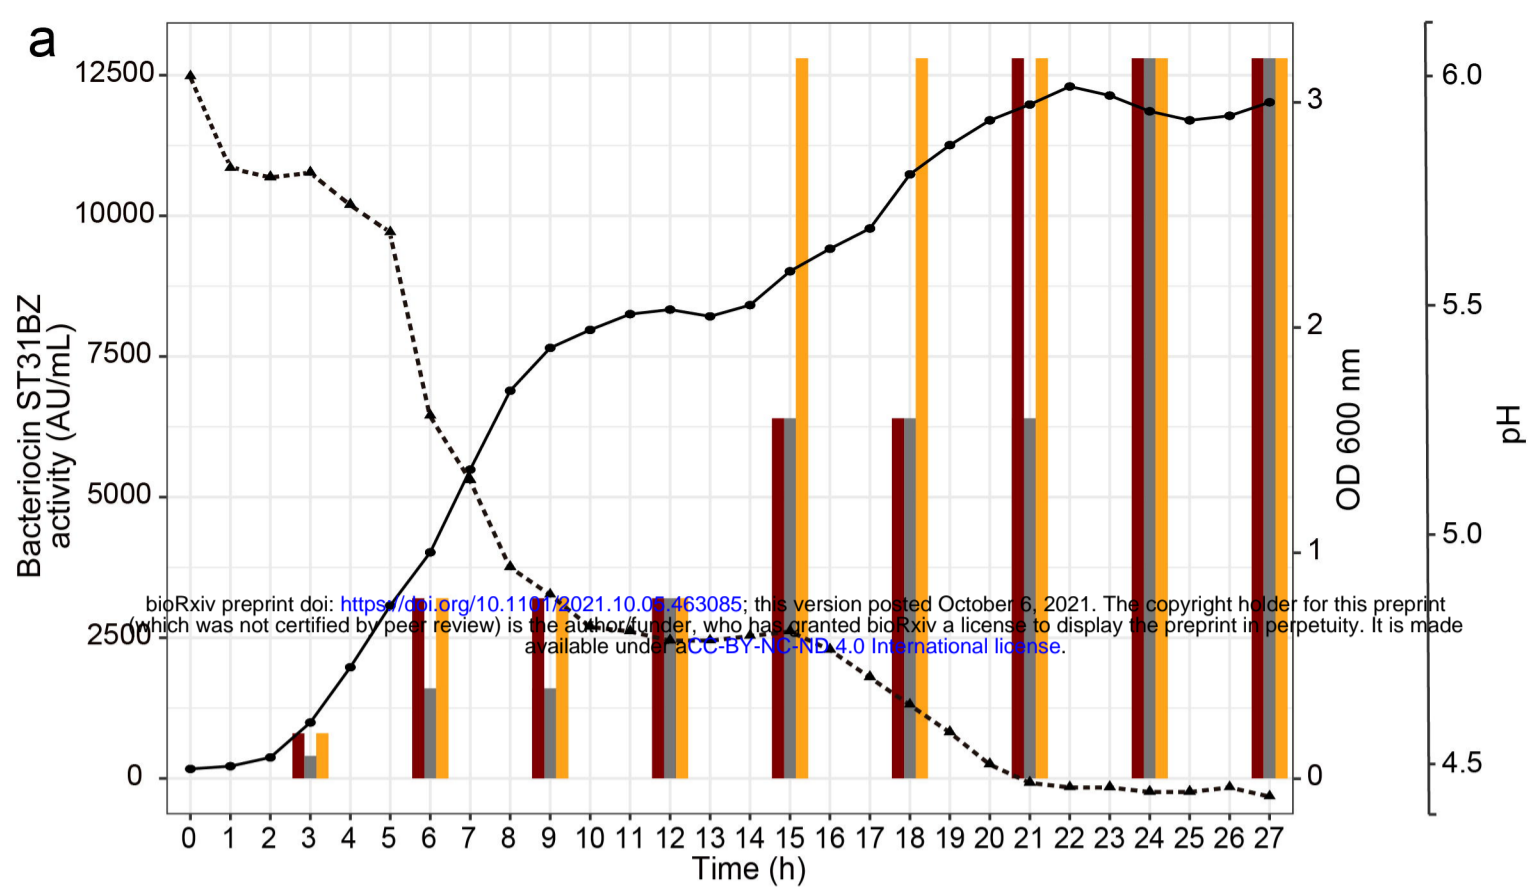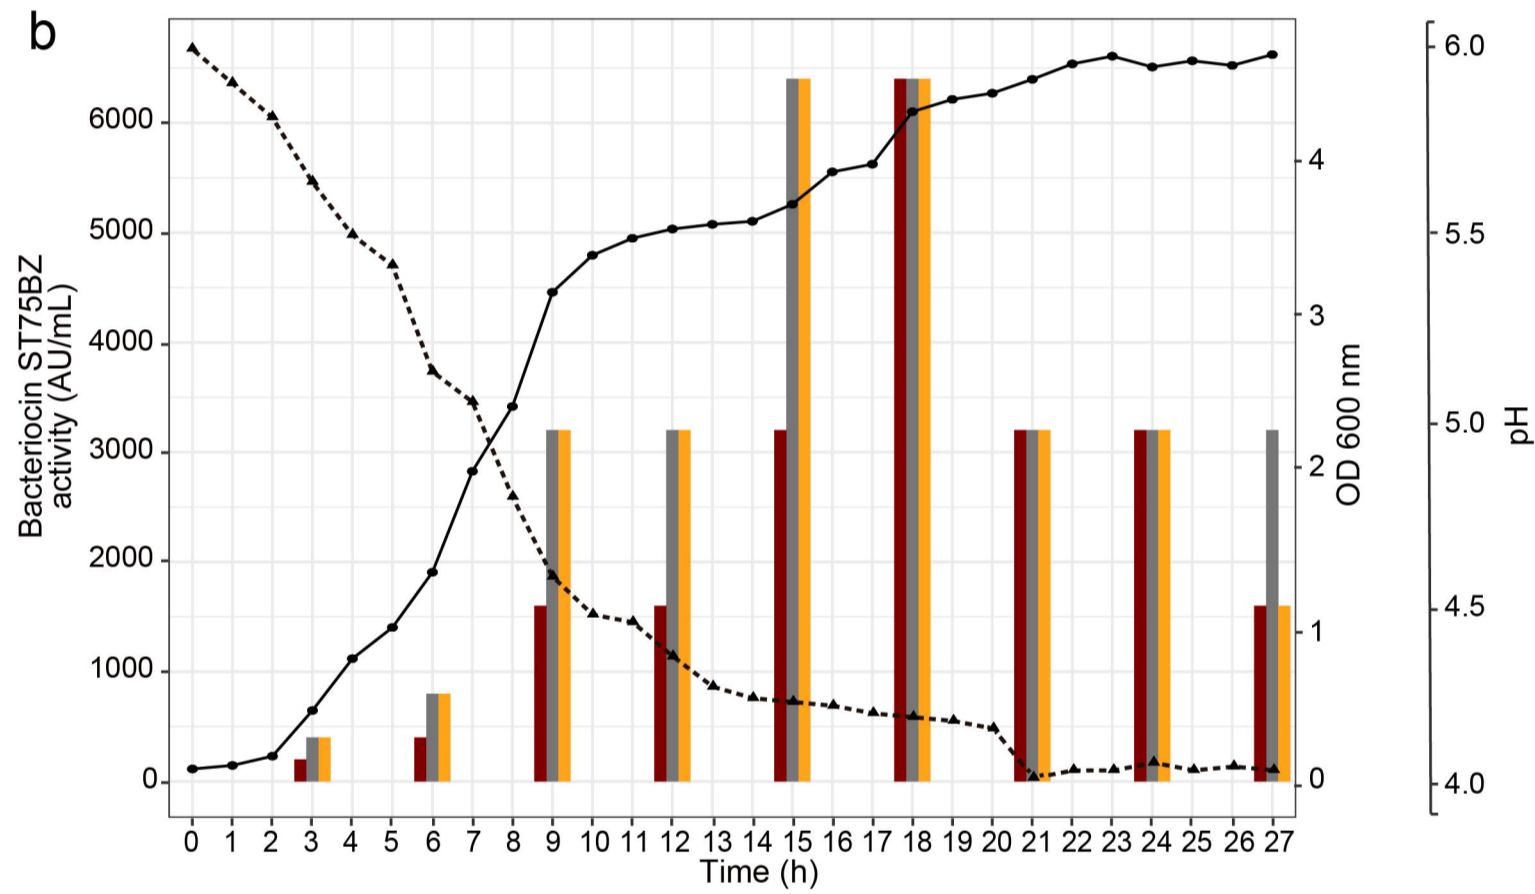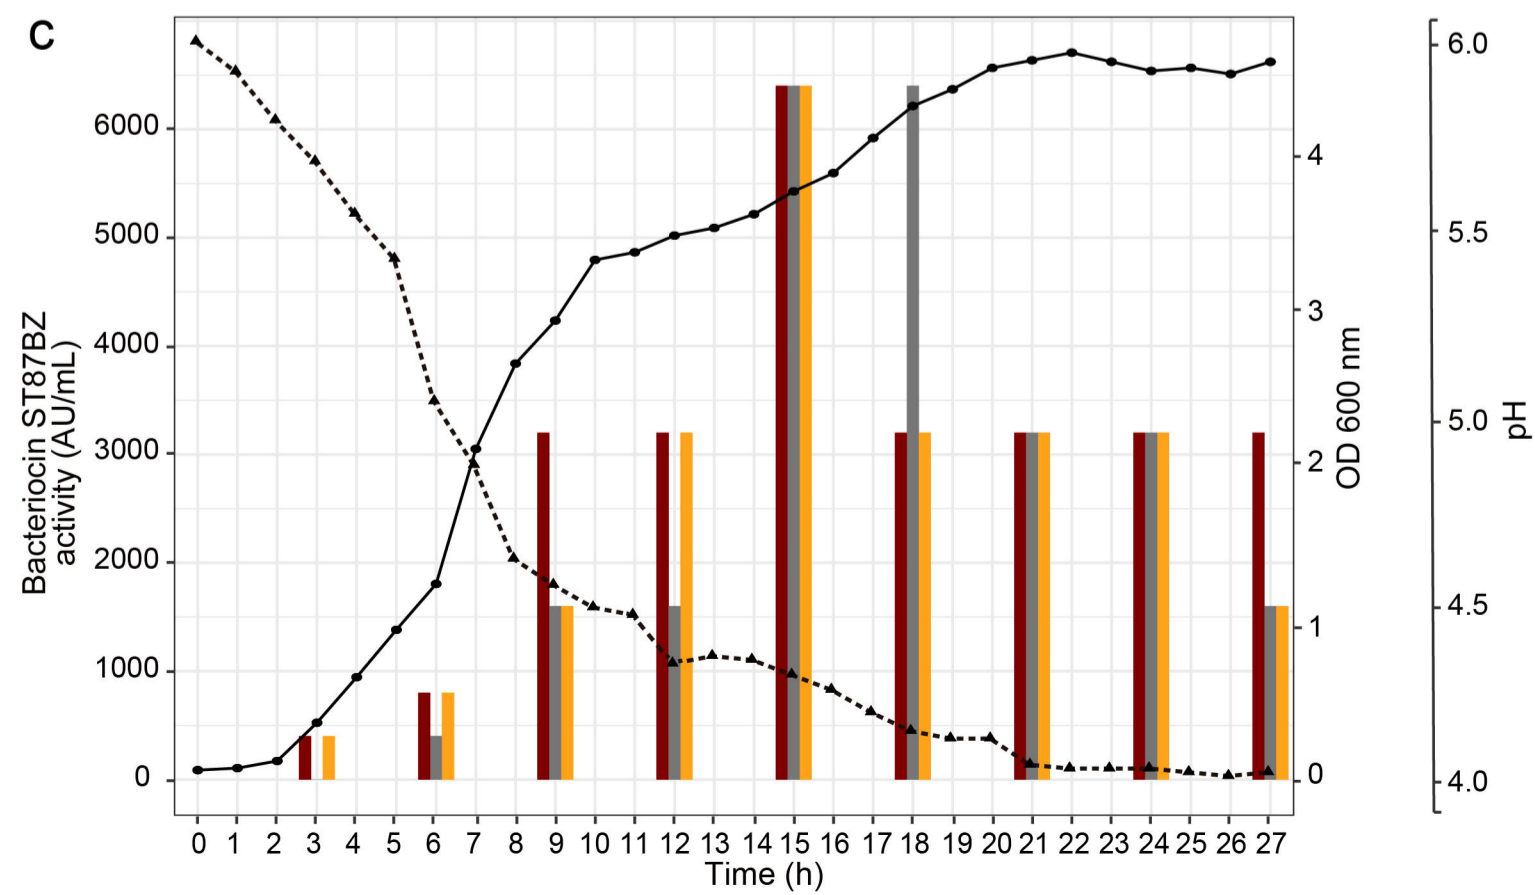

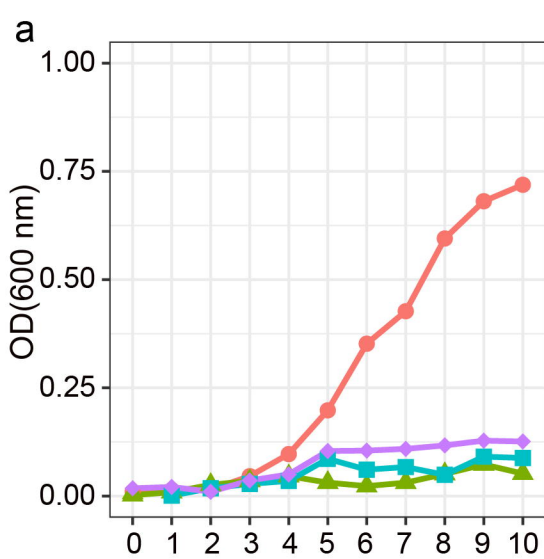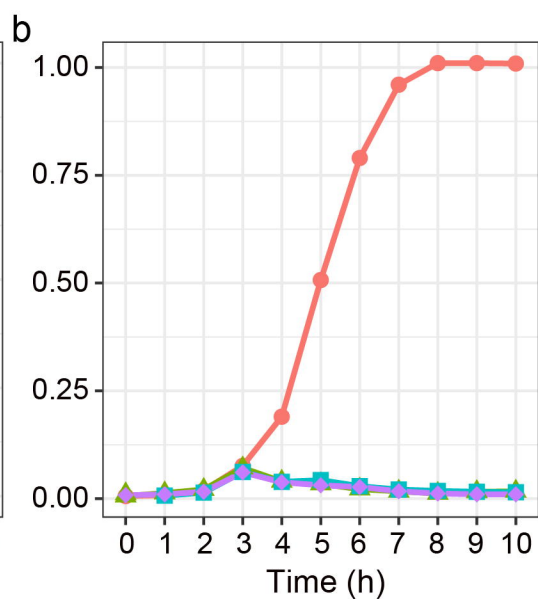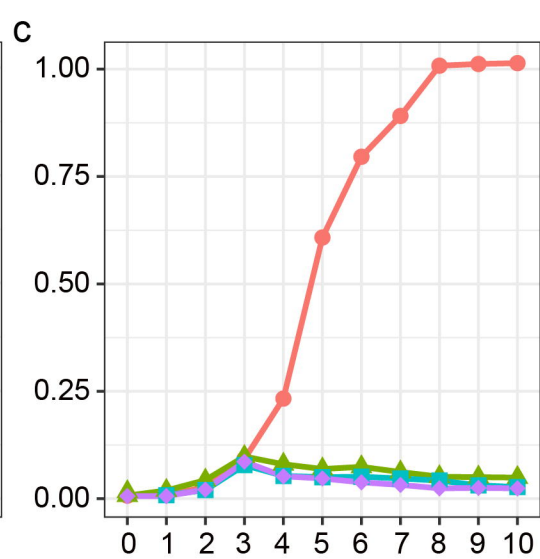

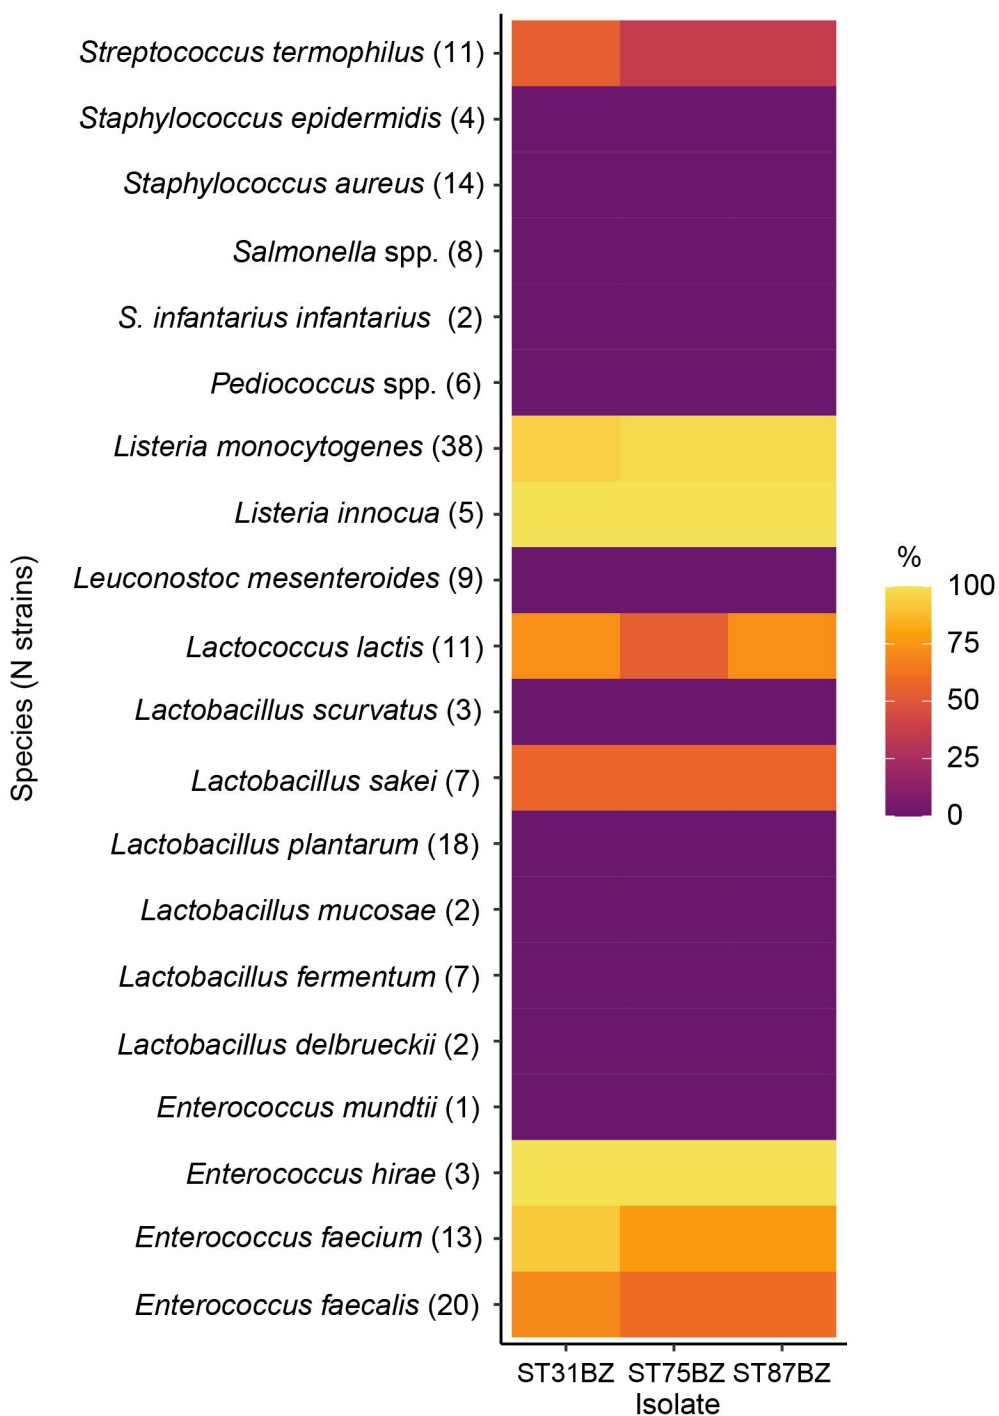

Source: https://www.biorxiv.org/content/10.1101/2021.10.05.463085v1.full.pdf
